# Supplementary material for: DNA-mediated coupling of ATPase, translocase and nuclease activities of a Type ISP restriction-modification enzyme
Source: PubMed Central journal article supplement (PMC7049714; doi:10.1093/nar/gkaa023), 2020-01-24
Supplement: gkaa023_supplemental_file.pdf [file gkaa023_supplemental_file.pdf]

## **Supplementary Information**

### **DNA-mediated coupling of ATPase, translocase and nuclease activities of a Type ISP restriction-modification enzyme**

**Mahesh Kumar Chand, Vanessa Carle, K. G. Anuvind, Kayarat Saikrishnan\***

*Division of Biology, Indian Institute of Science Education and Research, Pune, 411008, India.*

*\*Corresponding author*

email: saikrishnan@iiserpune.ac.in

Phone: +91 2025908047

Fax: +91 2025908186

|                              |          |               |           |     |
|------------------------------|----------|---------------|-----------|-----|
| <i>LlaIII/1-29</i>           | MYQTATPK | IYGESAKKNAK   | DKSILLS   | SMD |
| <i>LlaG1/1-29</i>            | MYQTATPK | IYGESAKKNAK   | DKSILLS   | SMD |
| <i>AaaTCORF264P/1-29</i>     | LYMTATPK | IYVQESKTKAA   | ENDVKVFL  | SMD |
| <i>AaaORF378P/1-29</i>       | LYMTATPK | IFADKSKTKAN   | EADAVLFL  | SMD |
| <i>AaaK3ORFBP/1-29</i>       | LYMTATPK | IYDDTKARAG    | OKNAFLA   | SMD |
| <i>Apo3283ORF18740P/1-29</i> | LYMTATPK | IYGDVAQEKAE   | KEGAIIVY  | GMN |
| <i>Acp180ORF1406P/1-29</i>   | LYMTATPK | IFADKTKNTAS   | EKDVLILT  | SMD |
| <i>AspDJORF2890P/1-29</i>    | LYMTATPK | IYGDNAKIMAE   | SGEVTLCS  | SMD |
| <i>Bce1271ORF56640P/1-29</i> | MYQTATPK | IYADSAKKNKAK  | DKSILLS   | SMD |
| <i>BfYORF1980P/1-29</i>      | LYMTATPK | LYSDDSKSKAA   | QGDAILLC  | SMD |
| <i>BsBGRORF24100P/1-29</i>   | LYMTATPK | IYAEASKTKAE   | ESDIQVFL  | SMD |
| <i>Bpr4ORF12830P/1-29</i>    | LYMTATPK | IFSDNAKKQAN   | EIDAVLA   | SMD |
| <i>Bpr4ORF17060P/1-29</i>    | LYMTATPK | IFSDNAKKQAN   | EIDAVLA   | SMD |
| <i>Bpr4ORF18960P/1-29</i>    | LYMTATPK | IFGDNAKSRAN   | EANVVLVA  | SMD |
| <i>Bpr4ORF17840P/1-29</i>    | LYMTATPK | IFTDKCLKKAD   | VSDAVLA   | SMD |
| <i>Bpr4ORF3060P/1-29</i>     | LYMTATPK | IFTDDAKKNAD   | EINAVLA   | SMD |
| <i>BhoHORF15450P/1-29</i>    | LYMTATPK | IFGDNAKSRAN   | EANVVLVA  | SMD |
| <i>BovEORF3337P/1-29</i>     | LYMTATPK | LYGQSAKIKAS   | EKDAILCS  | SMD |
| <i>BscR1ORF40207P/1-29</i>   | LYMTATPK | IFGDNVKSKQAN  | AVGAVLA   | SMD |
| <i>BtrCIPORF1006P/1-29</i>   | LYMTATPK | IFSDTAKRRAD   | EINAVLA   | SMD |
| <i>BtrCIPORF1021P/1-29</i>   | LYMTATPK | IFADSAKKQAH   | EMNGILAS  | SMD |
| <i>BtrCIPORF1035P/1-29</i>   | LYMTATPK | IFSNHAKRRAD   | EVDAVLA   | SMD |
| <i>BtrCIPORF1064P/1-29</i>   | LYMTATPK | IFADSAKKQAH   | EMNGILAS  | SMD |
| <i>BtrCIPORF1080P/1-29</i>   | LYMTATPK | IFTDKCLKKAD   | ASDAVLA   | SMD |
| <i>BtrCIPORF1105P/1-29</i>   | LYMTATPK | IFSDTAKRRAD   | EINAVLA   | SMD |
| <i>BtrCIPORF14P/1-29</i>     | LYMTATPK | IFTDDAKKNAD   | EINAVLA   | SMD |
| <i>BtrCIPORF164P/1-29</i>    | LYMTATPK | IFADSAKKQAH   | EMNGILAS  | SMD |
| <i>BtrCIPORF2491P/1-29</i>   | LYMTATPK | IFGDNAKSRAN   | EANAVLA   | SMD |
| <i>BtrCIPORF455P/1-29</i>    | LYMTATPK | IFSDKCLKRRAF  | LSNNVLV   | SMD |
| <i>BtrCIPORF541P/1-29</i>    | LYMTATPK | IFSNHAKRRAD   | EVDAVLA   | SMD |
| <i>CehORF378EP/1-29</i>      | LYMTATPK | RMYNVDARSQAA  | KQAIPLWS  | SMD |
| <i>CdpORF433P/1-29</i>       | LYMTATPK | LFDEAVKGGKAA  | EHS AFLA  | SMD |
| <i>CglORF3009P/1-29</i>      | LYMTATPK | LFDDSVKGGKAA  | DHSAEVS   | SMD |
| <i>Cms364ORFAP/1-29</i>      | LYMTATPK | LFDDITKSKAE   | EHSAEIVY  | SMD |
| <i>Cps411ORF557P/1-29</i>    | LYMTATPK | LFDDITVGGKAA  | DHFAELAS  | SMD |
| <i>Cps119ORF359P/1-29</i>    | LYMTATPK | LFDDVGGKAA    | DHFAELAS  | SMD |
| <i>CspBORFGP/1-26</i>        | LYMTATPK | VVYSVLIKAE    | DMGKVIVY  | SMD |
| <i>CspORF142P/1-29</i>       | LYLTATPK | VFSDKTKKTKF   | EKELNLF   | SMD |
| <i>DaeORF402P/1-29</i>       | IYMTATPK | IYGDTAKATAE   | RDDIVLCS  | SMD |
| <i>DvtRCH1ORF2026P/1-29</i>  | LYMTATPK | LYAEOSKSKAK   | ERDIAVFL  | SMD |
| <i>EaeRM24P/1-29</i>         | LYMTATPK | IYTDSAKSKAR   | QSEFQLY   | SMD |
| <i>GbrORF7642P/1-29</i>      | LYMTATPK | IFADTVREKAE   | EHS AELT  | SMD |
| <i>Gen18890ORFHP/1-29</i>    | LYMTATPK | IYGDVAREKAE   | KEGAIIVY  | GMN |
| <i>GspSXCC1ORF365BP/1-29</i> | LYMTATPK | IYGDVAREKAE   | KEGAIIVY  | GMN |
| <i>HaeSORF1335P/1-30</i>     | LYMSATPK | IFSDNAKSKAKK  | DVEVELY   | SMD |
| <i>Hpy180ORF3395P/1-29</i>   | LYMTATPK | KVYESSKAKAK   | ESDNVIY   | SMD |
| <i>Hpy2018ORF6581P/1-29</i>  | LYMTATPK | KVYESSKAKAK   | EKDNVIY   | SMD |
| <i>Hpy20ORF3615P/1-29</i>    | LYMTATPK | KVYESSKAKAK   | ESDNAIY   | SMD |
| <i>Hpy225ORF675P/1-29</i>    | LYMTATPK | KVYESSKAKAK   | ESDNAIY   | SMD |
| <i>Hpy30ORF661P/1-29</i>     | LYMTATPK | KVYESSKAKAK   | ESDNAIY   | SMD |
| <i>Hpy464ORF3445P/1-29</i>   | LYMTATPK | KVYESSKAKAK   | ESDNAIY   | SMD |
| <i>Hpy4ORF3450P/1-29</i>     | LYMTATPK | KVYESSKAKAK   | ESDNVIY   | SMD |
| <i>Hpy57ORF690P/1-29</i>     | LYMTATPK | KVYESSKAKAK   | ESDNAIY   | SMD |
| <i>Hpy75ORFBP/1-29</i>       | LYMTATPK | KVYESSKAKAK   | EKDNVIY   | SMD |
| <i>Hpy83ORF726P/1-29</i>     | LYMTATPK | KVYESSKAKAK   | ESDNVIY   | SMD |
| <i>Hpy908ORF680P/1-29</i>    | LYMTATPK | KVYESSKAKAK   | EKDNVIY   | SMD |
| <i>Hpy94ORF3450P/1-29</i>    | LYMTATPK | KVYESSKAKAK   | ESDNVIY   | SMD |
| <i>Hpy99ORF612P/1-29</i>     | LYMTATPK | KVYESSKAKAK   | EKDNVIY   | SMD |
| <i>HpyAORF663P/1-29</i>      | LYMTATPK | KVYESSKAKAK   | ESDNVIY   | SMD |
| <i>HpyB8ORF370P/1-29</i>     | LYMTATPK | KVYESSKAKAK   | ESDNVIY   | SMD |
| <i>HpyGORF629P/1-29</i>      | LYMTATPK | KVYESSKAKAK   | EKDNVIY   | SMD |
| <i>HpyHORF652P/1-29</i>      | LYMTATPK | KVYESSKAKAK   | ESDNVIY   | SMD |
| <i>HpyPORF680P/1-29</i>      | LYMTATPK | KVYESSKAKAK   | ESDNVIY   | SMD |
| <i>HpySORF3515P/1-29</i>     | LYMTATPK | KVYESSKAKAK   | ESDNAIY   | SMD |
| <i>Hso3336ORF1665P/1-26</i>  | LYMTATPK | IYTEDAKK - -  | SEGEVY    | SMD |
| <i>KhpF74ORFGP/1-29</i>      | LYMTATPK | RVEDGTRKKAPE  | ENSVVVA   | SMD |
| <i>LmPORF33P/1-29</i>        | LYMTATPK | IFGDIAKASAE   | KDNVTLCS  | SMD |
| <i>Lga21881ORFAP/1-29</i>    | LYQTATPK | IYVGOEAKNTAN  | EOSVVA    | SMD |
| <i>LncCORF21P/1-29</i>       | MYQTATPK | IYGESAKKNAK   | DKSILLS   | SMD |
| <i>Lpo6026ORF338P/1-29</i>   | LYQTATPK | IYDONAKKKAKE  | ENSIVVS   | SMD |
| <i>LsaSKORF6P/1-29</i>       | MYQTATPK | IYGESAKKNAK   | DKSILLS   | SMD |
| <i>LmoDORFAP/1-29</i>        | MYQTATPK | IYGESAKKNAK   | DKSILLS   | SMD |
| <i>LmtfGMORF20390P/1-29</i>  | LYMTATPK | IFFTSIKDRAD   | QHS AELV  | SMD |
| <i>MboBCTORF2038P/1-29</i>   | LYMTATPK | IFFTSIKDRAD   | QHS AELV  | SMD |
| <i>MpePMORF102P/1-29</i>     | LYMTATPK | IYGEASKTKAG   | EREAVLFL  | SMD |
| <i>MspELB17ORFDP/1-26</i>    | IYMTATPK | IYGEDAKQ - -  | TENVTLCS  | SMD |
| <i>MtuFORF12055P/1-29</i>    | LYMTATPK | IFFTSIKDRAD   | QHS AELV  | SMD |
| <i>Mva6833447ORFDP/1-29</i>  | LYMTATPK | IFGDAAKATAE   | RDNVALCS  | SMD |
| <i>MvaDKORF1808P/1-29</i>    | LYMTATPK | IFGDAAKATAE   | RDNVALCS  | SMD |
| <i>NeuCORF2561P/1-26</i>     | LYMTATPK | IYGDAAKQ - -  | TENVTLCS  | SMD |
| <i>NfrORF2220P/1-29</i>      | LYMTATPK | IFDITVKKKAA   | EHS AELS  | SMD |
| <i>NhrORF2986P/1-29</i>      | LYMTATPK | VFVPRLREKVE   | EQGVEYFL  | SMD |
| <i>P88505ORF1520P/1-29</i>   | LYMTATPK | VYVNDNAKATAK  | DKDLVLWS  | MN  |
| <i>PfCORF2950P/1-29</i>      | LYMTATPK | IYGEDVKKKAD   | EHS ALLTS | SMD |
| <i>Pma1322ORF4P/1-29</i>     | LYMTATPK | IYTDHSKQKAD   | DQNI GIYS | SMD |
| <i>PayTORF37P/1-29</i>       | LYMTATPK | IYGDNAKIKAE   | SGEVTLCS  | SMD |
| <i>PayORF2066P/1-29</i>      | LYMTATPK | LYTDEARKKAE   | ENDAILCS  | SMD |
| <i>Rso82ORF2304P/1-29</i>    | LYMTATPK | IYGD TAKSAE   | RDNVALCS  | SMD |
| <i>RspKIDORF4062P/1-29</i>   | LYMTATPK | IFGDNVRSKAD   | EVGAFLAS  | SMD |
| <i>RspSKORF2052P/1-29</i>    | LYMTATPK | IFADTAKRKAD   | DHDAKLA   | SMD |
| <i>Snu2025ORF1069P/1-29</i>  | LYQTATPK | IYGAEAKKKAKE  | DLSVVVIS  | SMD |
| <i>SroBORF1737P/1-29</i>     | LYMTATPK | IYDEKAKGKAD   | EHS AETA  | SMD |
| <i>Ssp18395ORFBP/1-29</i>    | LYMTATPK | RVFGDDARRKAD  | DANAALAD  | MD  |
| <i>SspBhdORF1863P/1-29</i>   | LYMTATPK | LYS EDSQKKAKE | DKEA TLCS | SMD |
| <i>TtnORF2915P/1-29</i>      | LYMTATPK | IYGEVAKSKAD   | RENIVLCS  | SMD |
| <i>TpyZAS2ORF2024P/1-29</i>  | IYMTATPK | LYS ESAKKAKE  | EADALLCS  | SMD |
| <i>TpyZAS2ORFAP/1-29</i>     | IYMTATPK | LYS ESAKKAKE  | EADALLCS  | SMD |

**Supplementary figure 1:** Amino acid sequence alignment of  $\beta$ -hairpin loop region in Type ISP R-M enzymes. The conserved lysine highlighted in red corresponds to LlaIII-Lys385.

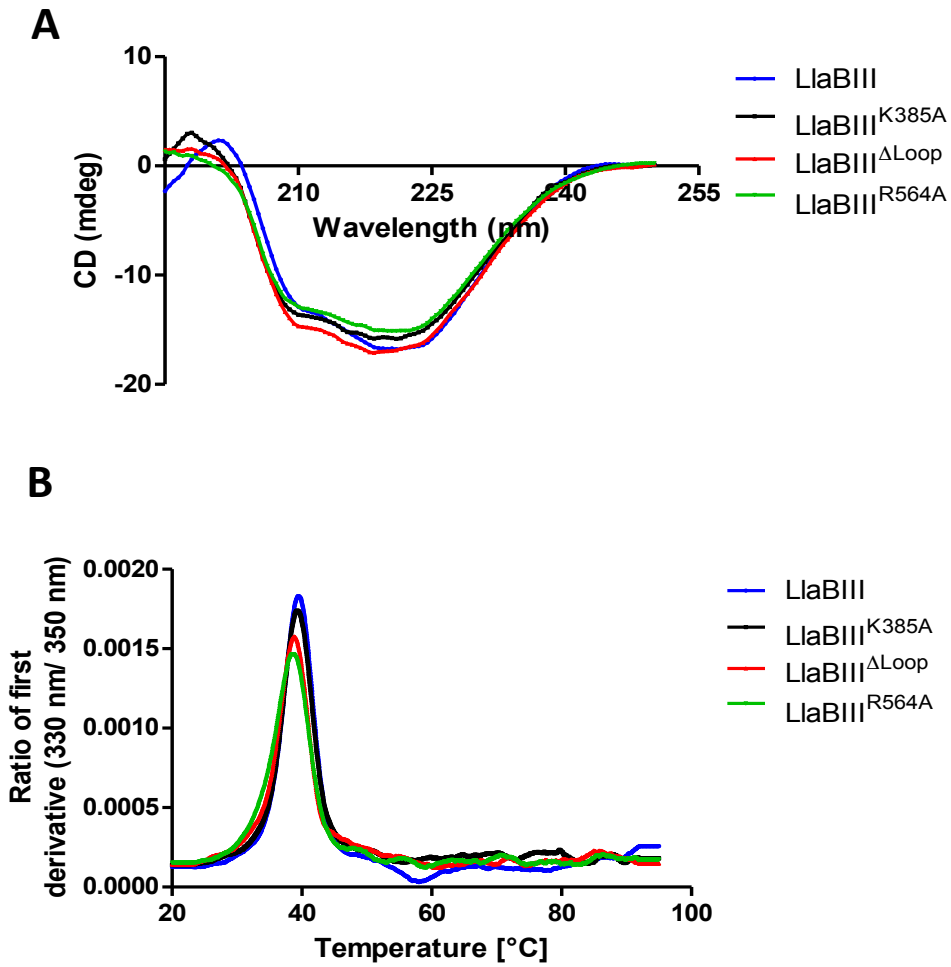

**Supplementary figure 2: (A)** Circular dichorism and **(B)** nanoDSF showing the conservation of secondary and tertiary structures of LlaBIII and its mutants.

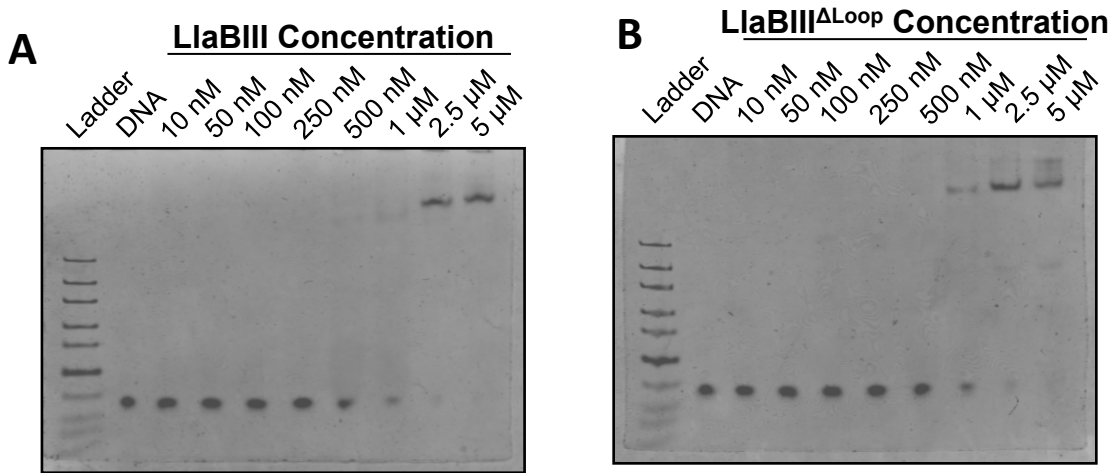

**Supplementary figure 3:** Electrophoretic mobility shift assay comparing the DNA binding affinities of **(A)** LlaBIII and **(B)** LlaBIII $\Delta$ Loop for a 28 bp non-specific DNA.

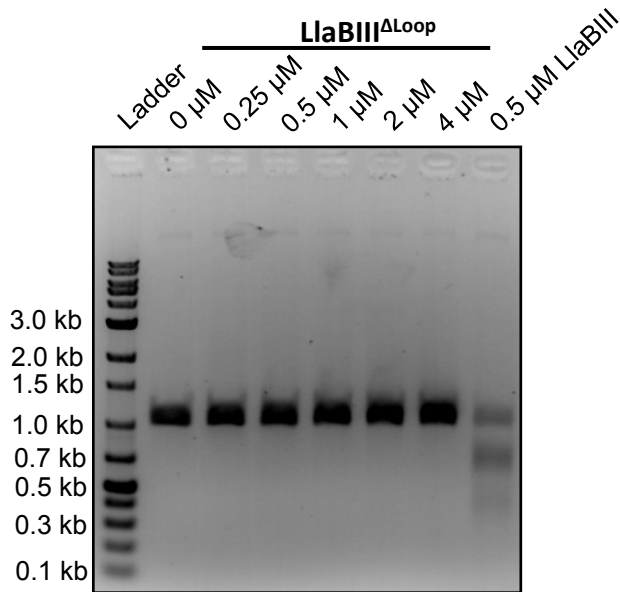

**Supplementary figure 4:** Concentration dependent DNA cleavage assay for LlaBIII<sup>ΔLoop</sup> shows that this mutant is unable to cleave substrate DNA even at concentration of 4 μM. Last lane shows DNA cleavage by LlaBIII wild type at 500 nM concentration.

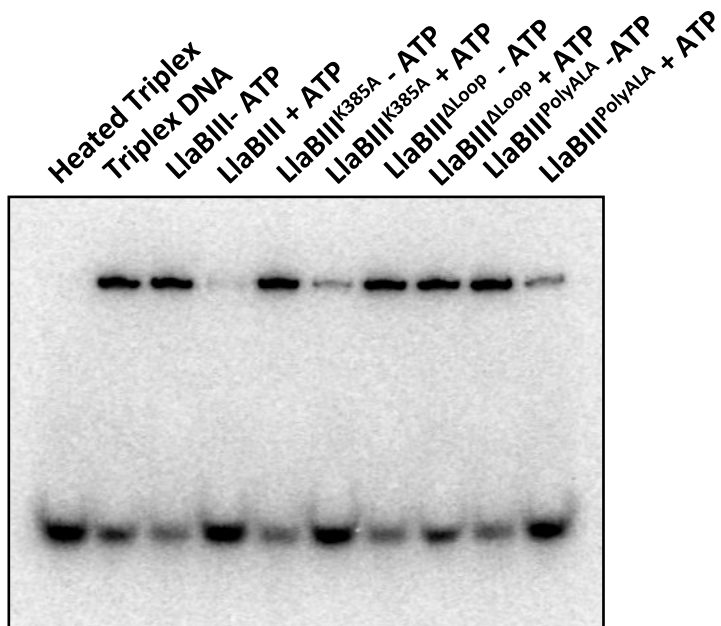

**Supplementary figure 5:** A representative gel of the triplex displacement assay showing the displacement of TFO by  $\beta$ -hairpin loop mutants in 10 minutes (see Figure 3B).

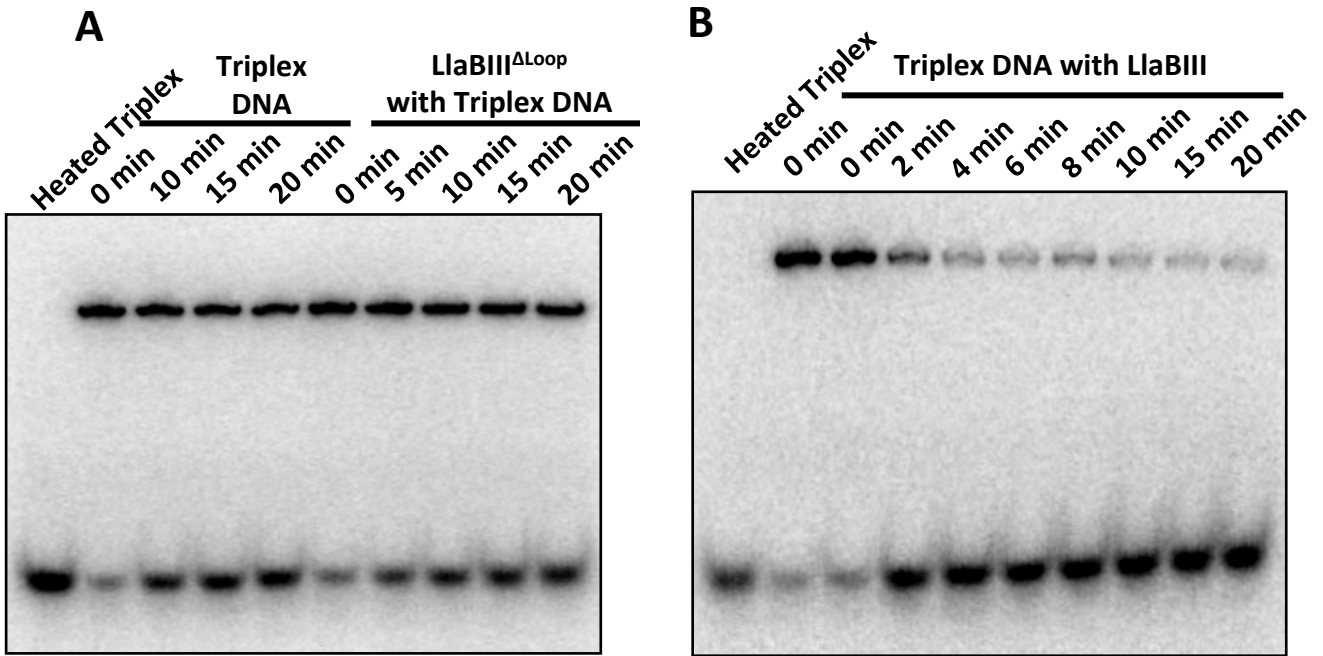

**Supplementary figure 6:** A representative gel of the triplex displacement assay showing time dependent displacement of TFO by LlaBIII and LlaBIII<sup>ΔLoop</sup>. **(A)** Triplex DNA control and LlaBIII<sup>ΔLoop</sup> **(B)** LlaBIII. (See Figure 3C)

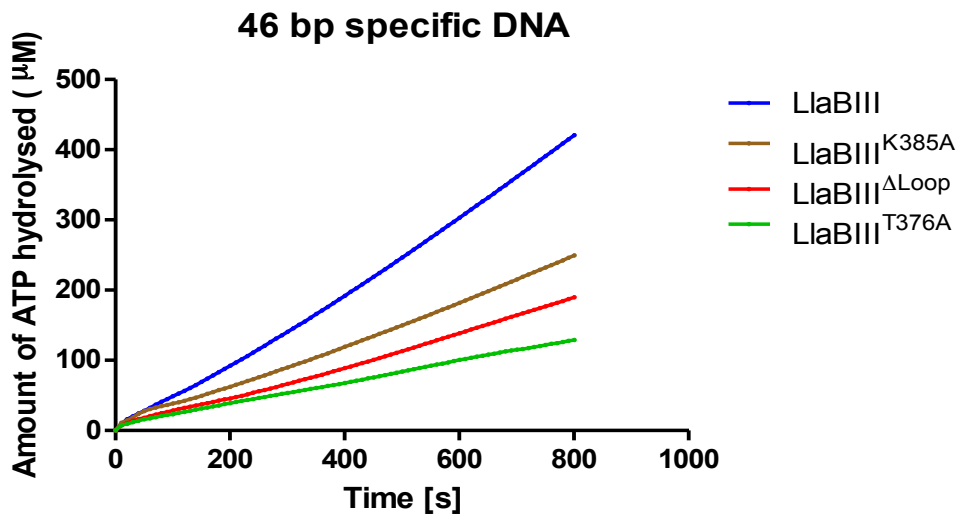

**Supplementary figure 7:** Comparison of the ATPase activity of LlaBIII<sup>T376A</sup> with LlaBIII<sup>K385A</sup> and LlaBIII<sup>ΔLoop</sup> in presence of 46 bp specific DNA and 1 mM ATP carried out at 25°C.



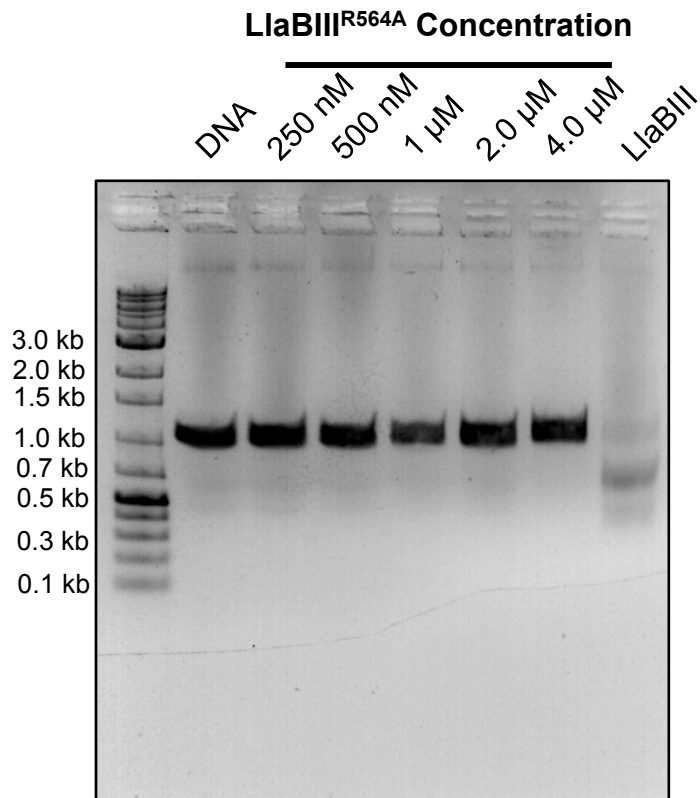

**Supplementary figure 8:** Concentration dependent DNA cleavage assay of LlaBIII<sup>R564A</sup> shows that this mutant is unable to cleave substrate DNA even at concentration of 4  $\mu$ M. Last lane shows DNA cleavage by WT LlaBIII at 500 nM concentration.

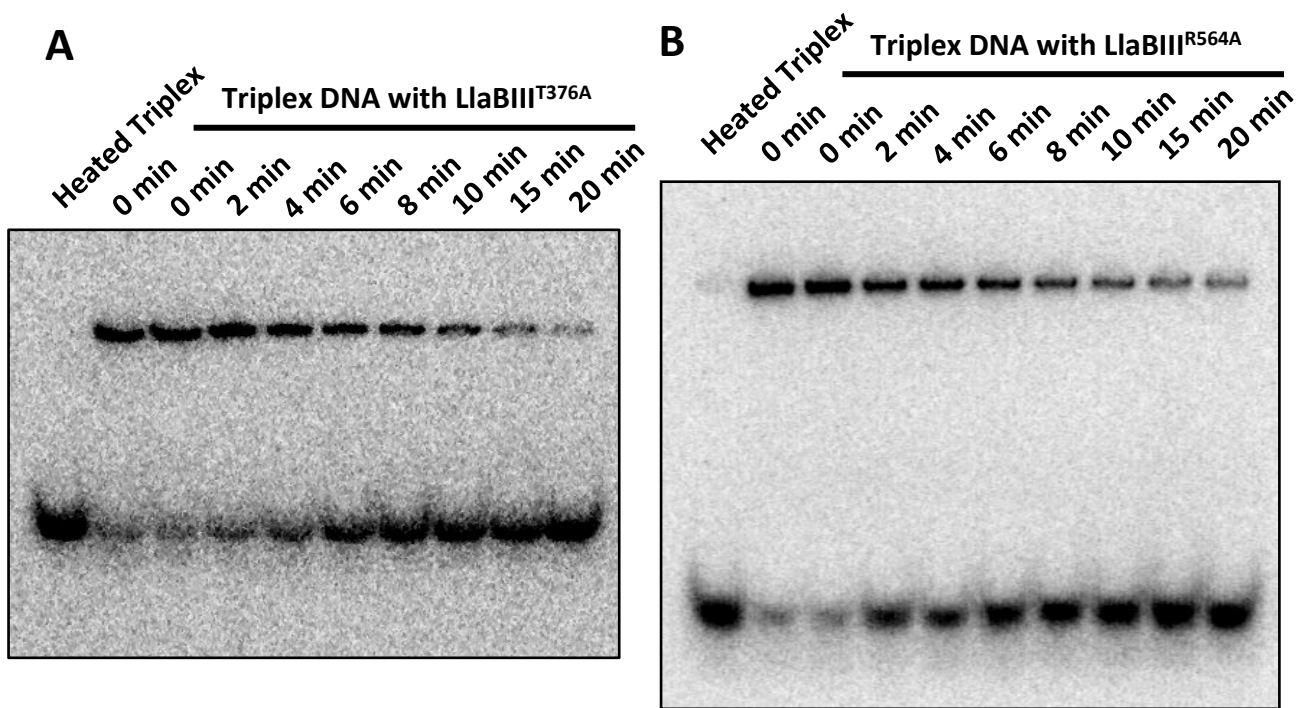

**Supplementary figure 9:** A representative gel of the triplex displacement assay showing time dependent displacement of TFO by (A) LlaBIII<sup>T376A</sup> and (B) LlaBIII<sup>R564A</sup> (see Figure 4E).

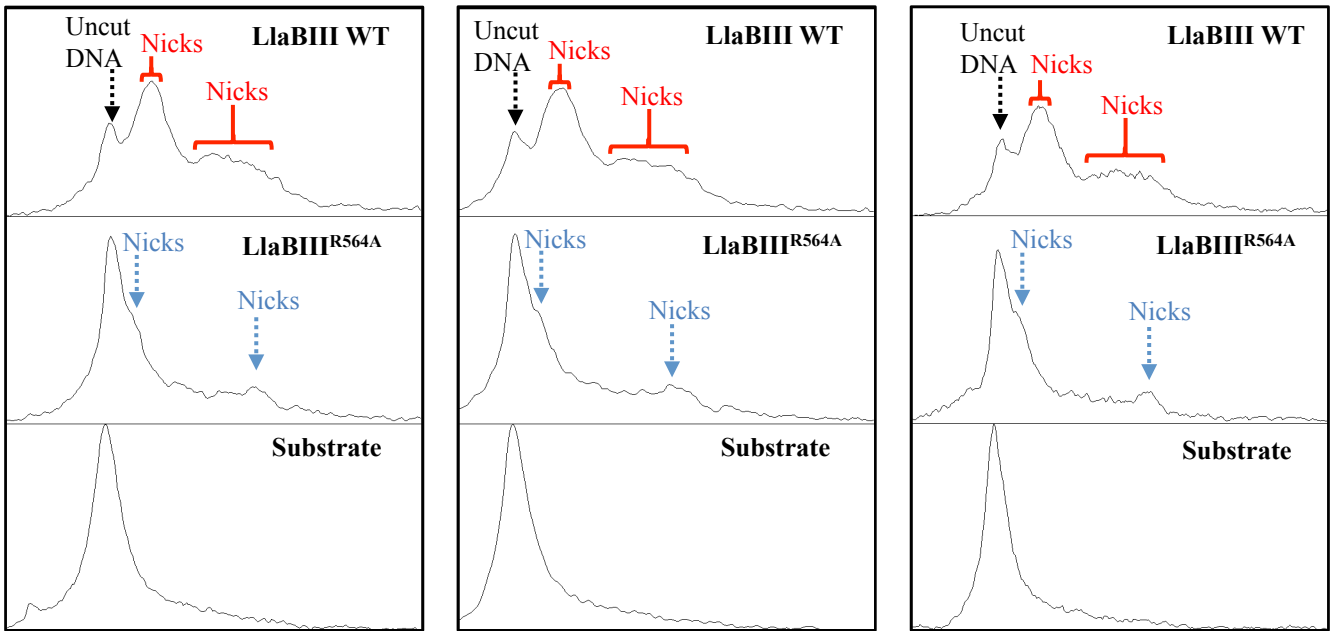

**Supplementary figure 10: DNA nicking by LlaBIII and LlaBIII<sup>R564A</sup>.** Densitometry of the urea-formamide PAGE showing faint nicking by LlaBIII<sup>R564A</sup> whereas LlaBIII nicks DNA with high efficiency. Black arrow shows the single-stranded uncut DNA. The red brackets shows the nicked product by LlaBIII whereas the blue arrows shows the nicked product by LlaBIII<sup>R564A</sup>.

**A**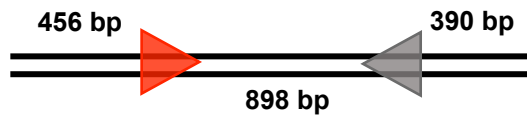**B**

|                          |   |   |   |   |   |   |   |   |
|--------------------------|---|---|---|---|---|---|---|---|
| LlaBIII                  | - | - | + | + | - | - | - | - |
| LlaBIII <sup>T376A</sup> | - | - | - | - | + | + | - | - |
| LlaBIII <sup>ΔLoop</sup> | - | - | - | - | - | - | + | + |
| LlaGI                    | - | + | - | + | - | + | - | + |
| DNA                      | + | + | + | + | + | + | + | + |

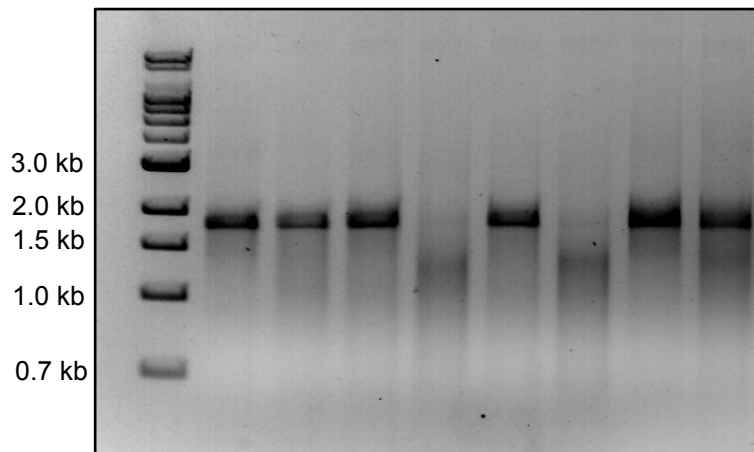

**Supplementary figure 11: Heterologous cooperation assay. (A)** Schematic of the DNA substrate used with LlaBIII site in red and the LlaGI site in grey. **(B)** DNA cleavage by LlaBIII or its mutants in cooperation with LlaGI. 500 nM of each enzyme was incubated with 10 nM of DNA and 4 mM of ATP for 30 minutes at 25 °C.

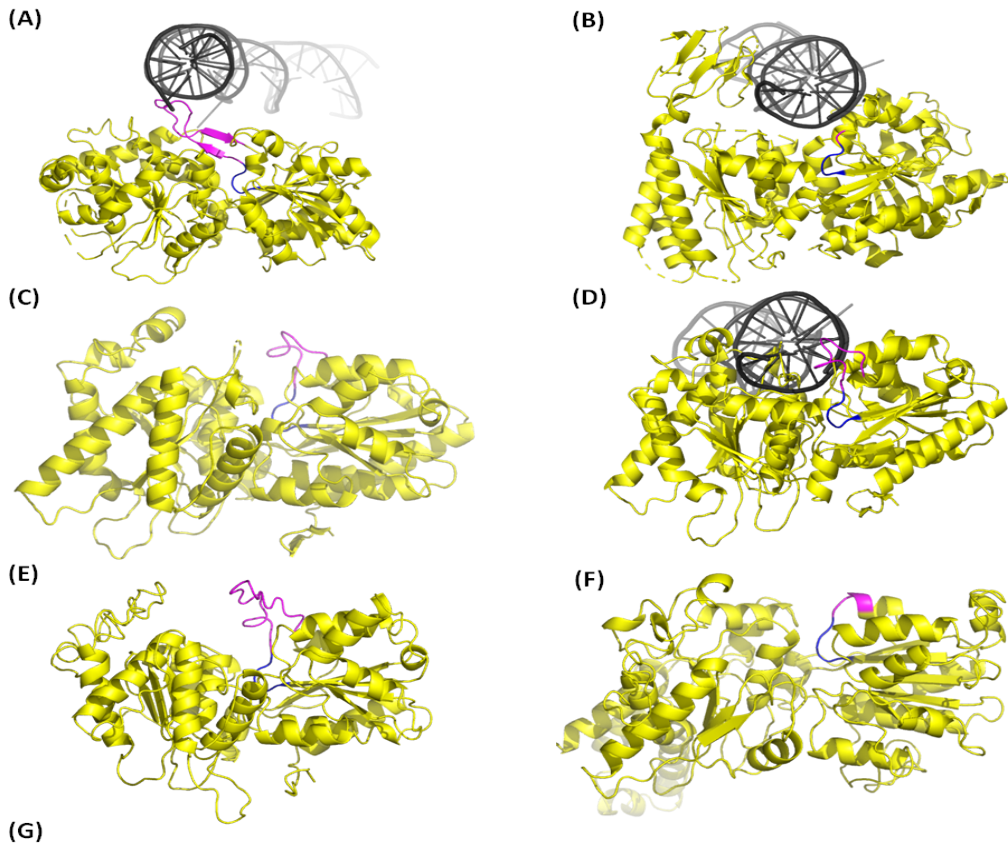

|                    |                            |     |               |                        |
|--------------------|----------------------------|-----|---------------|------------------------|
| LlaBIII/198-239    | YQIATPKIYGESAKKNAKDKSILLS  | SMD | DESKYGEVFFRMG | -----                  |
| LlaGI/198-239      | YQIATPKIYGESAKKNAKDKSILLS  | SMD | DESKYGEVFFRMG | -----                  |
| Mva1261III/166-196 | GLTATPVRYISRN              | --- | TFQMF         | FGCESTDPTYAYG--        |
| EcoAI/170-201      | GLTATPKETHEVS              | --- | ---           | STDYFGDPVVVYSLKEGIE    |
| EcoKI/194-221      | ALTATPALH                  | --- | ---           | TVQIFGEPVRYRYRTAVI     |
| KpnAI/203-230      | GFTGTPIIDA                 | --- | ---           | TMEVFGNIVDSYTMTESVQ    |
| BpuJo2/104-235     | GFTGTPEVSTDRN              | --- | ---           | TPAVFGGEYIDVYDMSQAVE   |
| PhaAI/205-236      | GFTGTPIELDDKD              | --- | ---           | TQEVFGKYVSIYDFEVAVE    |
| PacII/190-221      | GLTGTPIISGIERN             | --- | ---           | TFKLFGAEDDPGRYMNRYS    |
| DnuI/190-220       | AFTGTPLLKDDK               | --- | ---           | TQNKFGPIIHAYTMQRAVE    |
| FtnUI/177-210      | GFTGTPLLKSQKSDG            | --- | ---           | SITKFNGLIHKYTI DQAIK   |
| EcoOI/271/187-219  | GFTGTPLMKKDKKK             | --- | ---           | SVEVFGPPYIHTYKFDEAVA   |
| FclI/186-218       | GFTGTPLLQKDKQT             | --- | ---           | IMDIFGRYIHTYKFNEAVT    |
| CjeFII/209-236     | AFTATPKPK                  | --- | ---           | TLEMFGMPCDVNGEQRFI P   |
| Lla82I/202-242     | GLTGTPIFEANKKQENGT FART    | --- | ---           | TSQQYGPLLHSYTTKNAMD    |
| MpuUI/197-230      | GFSGTPIFEENNDRE            | --- | ---           | TQKIFGNEIDSYNMKDA I L  |
| TelBI/171-215      | GFTGTPIFEQNATYRTIEGQEARMVT | --- | ---           | TADVFGKQLHAYTITHAID    |
| EcoR124I/183-218   | GFTGTPIFPENALGSET          | --- | ---           | TASVFGRELHSHYVITDAIR   |
| Hov99XVI/189-227   | GFTGTPIFAONCDKNNPLGT       | --- | ---           | TEOKFGRC LHOYTI I DAIR |
| EcoP15I/251-272    | RYGATF                     | --- | ---           | SEGYKNLVYRLTAVDA-      |
| EcoPI/251-272      | RYGATF                     | --- | ---           | SEGYKNLVYRLTAVDA-      |

**Supplementary figure 12:** Structural comparison of the ATPase domains of (A) DNA-bound LlaBIII, (B) DNA-bound Type III RM enzyme EcoP15I (32), (C) Type I RM enzyme EcoR124I (33), (D) EcoR124I with a modeled DNA indicating the possibility of the interaction of hairpin loop (magenta) with the DNA, (E) Type I RM enzyme TelBI modeled using I-TASSER (34) and (F) EcoKI modeled using I-TASSER. The position of the  $\beta$ -hairpin loop is colored magenta. Blue color represents motif III. The  $\beta$ -hairpin loop appears to be present in EcoR124I and TelBI, but is absent in EcoKI and EcoP15I. (G) Sequence alignment of a part of the helicase domain of Type ISP (LlaBIII and LlaGI), Type I and Type III (EcoP15I and EcoPI) indicating the possible presence of an equivalent loop in Type I RM enzymes.

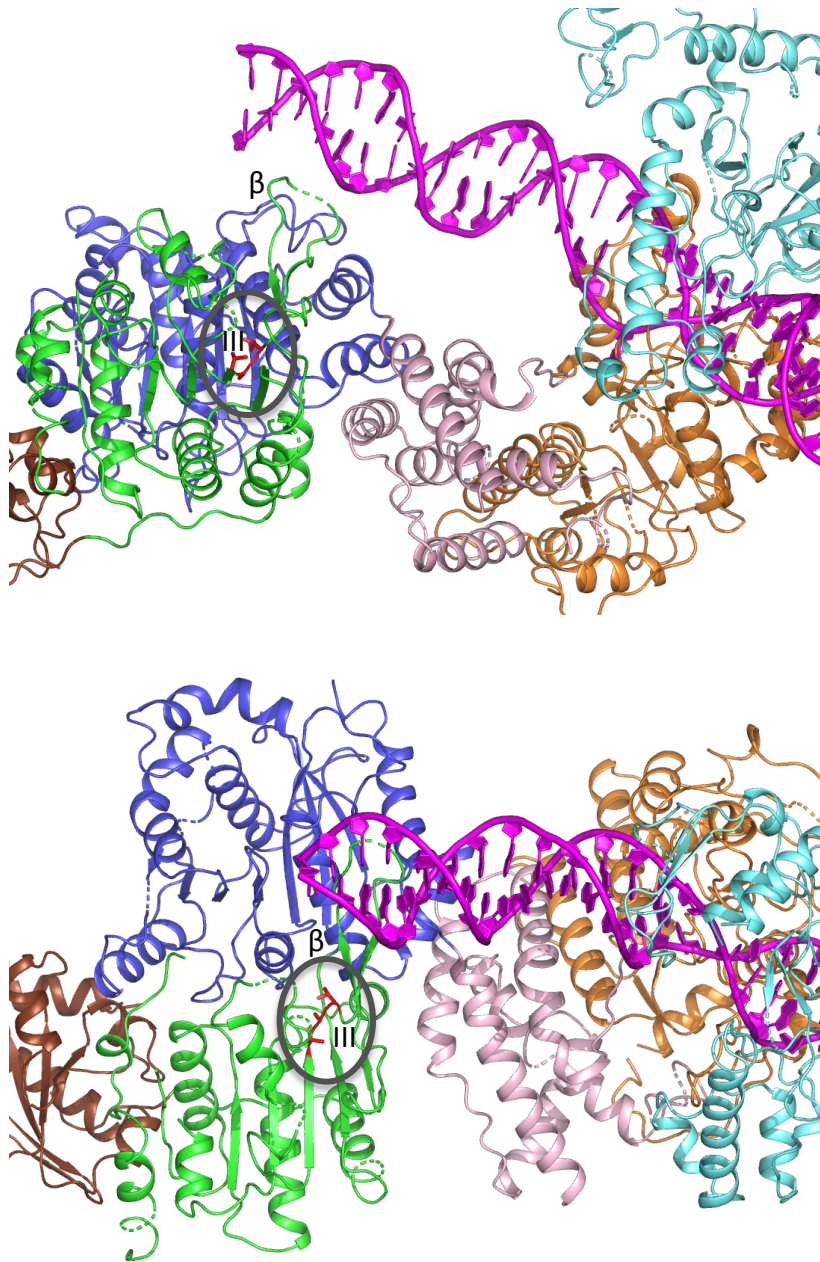

**Supplementary figure 13:** Structure of LlaBIII-DNA complex highlighting the position of motif III (red) with respect to the DNA and  $\beta$ -hairpin loop.

**Supplementary Table 1: DNA oligomers used for the study.**

| <b>Primer</b>      | <b>Sequence</b>                                           |
|--------------------|-----------------------------------------------------------|
| LB-pRSF-F          | ACTTTAATAAGGAGATATAACCATGGTGGCATT TTTGGAAGGAATG           |
| LB-pRSF-R          | CGCAGCAGCGGTTTCTTTACCAGACTCGAGTTATAGTCCCTGTACTACTCT<br>TG |
| K385A-R            | GATACTCTTGTCTTTGGCATT TTTTGGCCGCACTTTCCCATATATCTTTGG      |
| $\Delta$ Loop-2G-F | CACCAAAGATATATGGGGAAGGTGGTAAGAGTATCTTAC                   |
| $\Delta$ Loop-2G-R | GATGAAAGTAAGATACTCTTACCACCTTCCCATATATC                    |
| PolyALA-R          | GATACTCTTGTCTGCGGCAGCTGCTGCCGCACTTCCCATATATC              |
| T376A-R            | CTTTCCCATATATCTTTGGTGCAGCCGTTTGGTACATTC                   |
| R564A-R            | CGATTCCTTCCGTTAAGAAGGCGACATTAGAAACAATTCCG                 |
| LB-1074-F          | GCAACGGACGCTCGCTGATCCAG                                   |
| LB-1074-R          | CCATCGCTTGGGAGACGGGGTTTTG                                 |
| LJ1HISF            | GAAGGAGATATACATATGGGTAAAATCGTCCTGCC                       |
| LJ1HISR1           | GATGATGATGATGGGATCCTTATTCTTCCGTGGAC                       |
| 200bp_FP           | CTGTATGAAGCCCTGCAGAAC                                     |
| 1439bp_RP          | TCTATTAATTGTTGCCGGGAAGC                                   |
| Oligo23-F          | TTAGCTAATAGACTGAGCCGAGG                                   |
| Oligo23-R          | TCCTCGGCTCAGTCTATTAGCTA                                   |
| Oligo28-F          | GCTCTAGCTAATAGACTGAGCCGAGGTG                              |
| Oligo28-R          | CACCTCGGCTCAGTCTATTAGCTAGAGC                              |
| Oligo32-F          | GCCTGCTCTAGCTAATAGACTGAGCCGAGGTG                          |
| Oligo32-R          | CACCTCGGCTCAGTCTATTAGCTAGAGCAGGC                          |
| Oligo33-F          | GACCTGCTCTAGCTAATAGACTGAGCCGAGGTG                         |
| Oligo33-R          | CACCTCGGCTCAGTCTATTAGCTAGAGCAGGTC                         |
| Oligo34-F          | GTACCTGCTCTAGCTAATAGACTGAGCCGAGGTG                        |
| Oligo34-R          | CACCTCGGCTCAGTCTATTAGCTAGAGCAGGTAC                        |
| Oligo35-F          | GTCACCTGCTCTAGCTAATAGACTGAGCCGAGGTG                       |
| Oligo35-R          | CACCTCGGCTCAGTCTATTAGCTAGAGCAGGTGAC                       |
| Oligo46-F          | GTCTTATGCAGGTCACCTGCTCTAGCTAATAGACTGAGCCGAGGTG            |

|           |                                                |
|-----------|------------------------------------------------|
| Oligo46-R | CACCTCGGCTCAGTCTATTAGCTAGAGCAGGTGACCTGCATAAGAC |
| TFO_1     | TTCTTTTCTTTCTTCTTTCTTT                         |
| TFO_3     | TTCTTTCTTTTCTTTCTTTCTT                         |
| NSP40-F   | GTACTCAGCAGTATCCTGTATGCTACGTATTGCTATCGTG       |
| NSP40-R   | CACGATAGCAATACGTAGCATAACAGGATACTGCTGAGTAC      |



### Supplementary References:

32. Gupta, Y.K., Chan, S.H., Xu, S.Y. and Aggarwal, A.K. (2015) Structural basis of asymmetric DNA methylation and ATP-triggered long-range diffusion by EcoP15I. *Nature communications*, **6**, 7363.
33. Lapkouski, M., Panjikar, S., Janscak, P., Smatanova, I.K., Carey, J., Ettrich, R. and Csefalvay, E. (2009) Structure of the motor subunit of type I restriction-modification complex EcoR124I. *Nature structural & molecular biology*, **16**, 94-95.
34. Yang, J., Yan, R., Roy, A., Xu, D., Poisson, J. and Zhang, Y. (2015) The I-TASSER Suite: protein structure and function prediction. *Nature methods*, **12**, 7-8.
